# Supplementary material
Source: Elsevier journal article supplement (https://univ-rennes.hal.science/hal-01414693v1/file/mmc2.pdf)
Supplement: mmc2 [file mmc2.pdf]

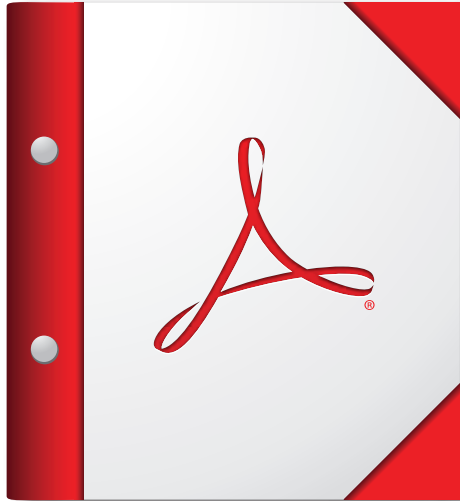

**For the best experience, open this PDF portfolio in  
Acrobat X or Adobe Reader X, or later.**

[Get Adobe Reader Now!](#)
